# Supplementary material for: Competitive Effect of Zinc and Cadmium on the Biosorption of Chromium by Orange Waste
Source: MDPI journal article supplement (doi:10.3390/pr12010148), 2024-01-08
Supplement: s1 [file s1]

## Supplementary Material

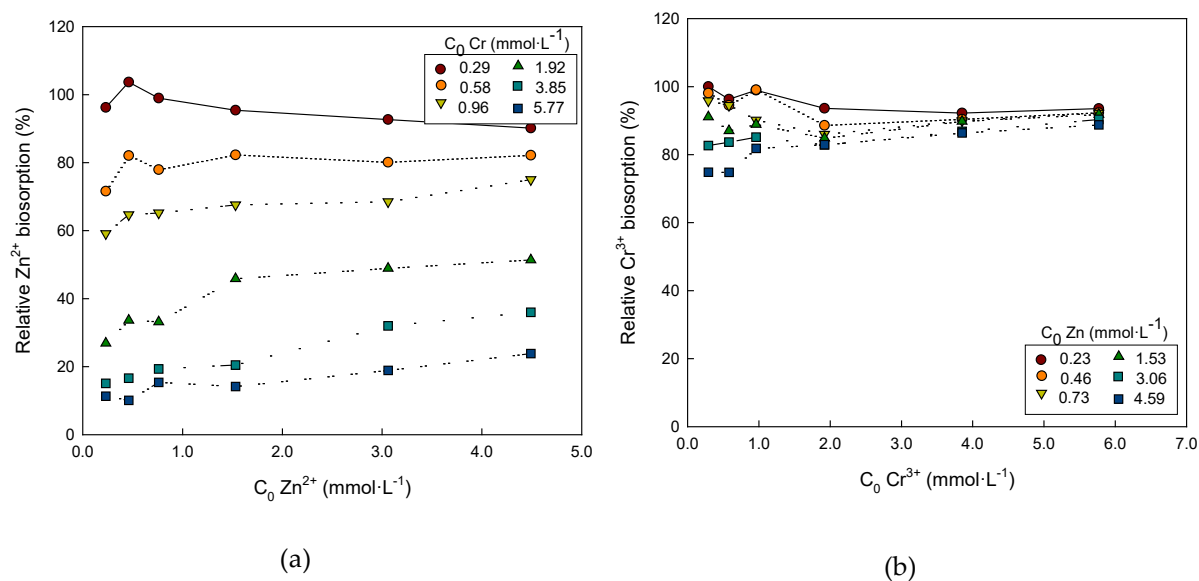

**Figure S1.** Dependence of the relative metal *i* biosorption on the initial concentrations of metals *i* and *k*. (a) Metal *i* =  $\text{Zn}^{2+}$  and metal *k* =  $\text{Cr}^{3+}$ , (b) Metal *i* =  $\text{Cr}^{3+}$  and metal *k* =  $\text{Zn}^{2+}$ .

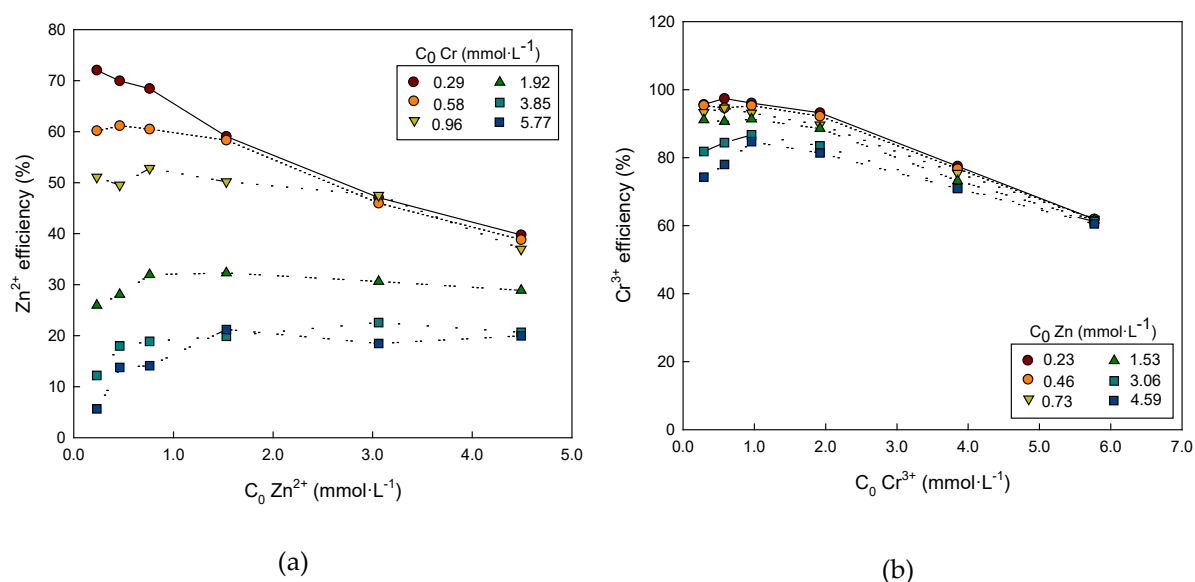

**Figure S2.** Dependence of the metal *i* biosorption efficiency on the initial concentrations of metals *i* and *k*. (a) Metal *i* =  $\text{Zn}^{2+}$  and metal *k* =  $\text{Cr}^{3+}$ , (b) Metal *i* =  $\text{Cr}^{3+}$  and metal *k* =  $\text{Zn}^{2+}$ .

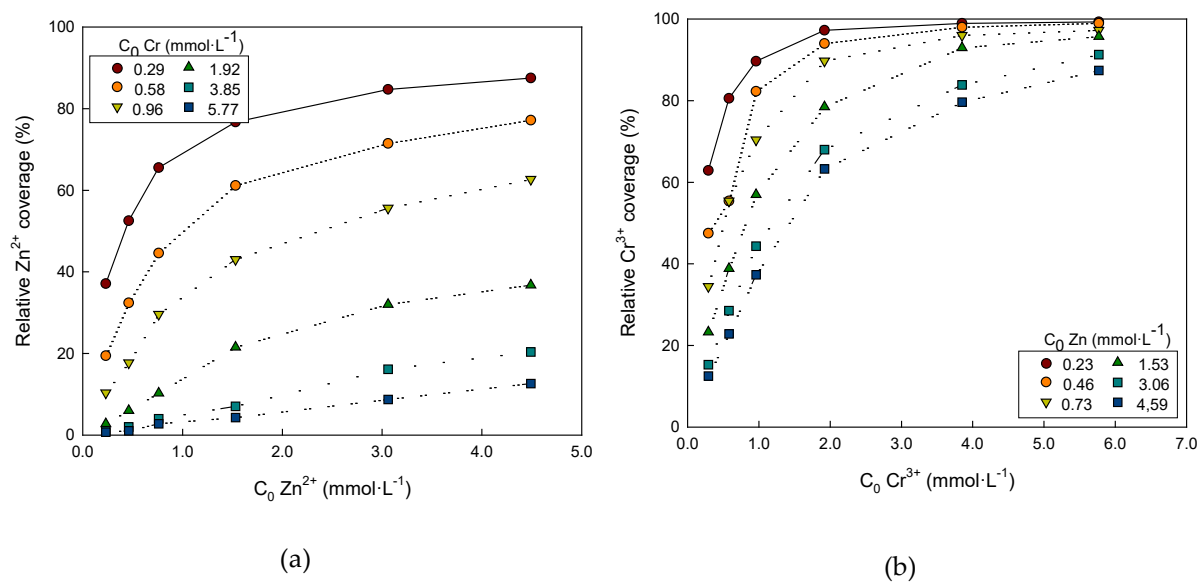

**Figure S3.** Dependence of the relative metal  $i$  coverage on the initial concentrations of metals  $i$  and  $k$ . (a) Metal  $i = \text{Zn}^{2+}$  and metal  $k = \text{Cr}^{3+}$ , (b) Metal  $i = \text{Cr}^{3+}$  and metal  $k = \text{Zn}^{2+}$ .
